# Supplementary material
Source: Springer Nature journal article supplement (https://www.springermedizin.de/resource/supplementary/12955_2012_1093_MOESM1_ESM.pdf/9559244)
Supplement: MOESM1 [file 9559244]

|        |                          | PROMIS      |              |             |                   | IIEF          |                          |                          |                   |                   |
|--------|--------------------------|-------------|--------------|-------------|-------------------|---------------|--------------------------|--------------------------|-------------------|-------------------|
|        |                          | Interest    | Satisfaction | Orgasm      | Erectile Function | Sexual Desire | Intercourse Satisfaction | Overall Satisfaction     | Orgasmic Function | Erectile Function |
| PROMIS | Interest                 |             |              |             |                   |               |                          |                          |                   |                   |
|        | Satisfaction             | 0.38        |              |             |                   |               |                          | Monotrait-heteromethod   |                   |                   |
|        | Orgasm                   | 0.53        | 0.68         |             |                   |               |                          | Heterotrait-monomethod   |                   |                   |
|        | Erectile function        | 0.43        | 0.66         | 0.73        |                   |               |                          | Heterotrait-heteromethod |                   |                   |
| IIEF   | Sexual Desire            | <b>0.82</b> | 0.46         | 0.57        | 0.50              |               |                          |                          |                   |                   |
|        | Intercourse Satisfaction | 0.30        | <b>0.76</b>  | 0.67        | 0.76              | 0.41          |                          |                          |                   |                   |
|        | Overall Satisfaction     | 0.20        | <b>0.83</b>  | 0.51        | 0.57              | 0.30          | 0.73                     |                          |                   |                   |
|        | Orgasmic Function        | 0.16        | 0.57         | <b>0.62</b> | 0.60              | 0.29          | 0.62                     | 0.51                     |                   |                   |
|        | Erectile Function        | 0.46        | 0.71         | 0.76        | <b>0.83</b>       | 0.51          | 0.82                     | 0.62                     | 0.61              |                   |

Abbreviations: PROMIS Patient Reported Outcomes Measurement Information System; IIEF International Index of Erectile Function
